# Supplementary material for: SYK Targeting Represents a Potential Therapeutic Option for Relapsed Resistant Pediatric ETV6-RUNX1 B-Acute Lymphoblastic Leukemia Patients
Source: Int J Mol Sci. 2019 Dec 7;20(24):6175. doi: 10.3390/ijms20246175 (PMC6940898; doi:10.3390/ijms20246175)
Supplement: Supplementary file 1 [file ijms-20-06175-s001.pdf]

## Supplementary Table S1

**Combination Index (CI) values in AT-1, AT-2 and REH cell lines.** CIs were calculated by CalcuSyn software at the effective dose necessary to reduce the cell viability of the 50% (GI<sub>50</sub>) in AT-1, AT-2 and REH cell lines at 48 hours, measured by MTT test. Synergy, additivity and antagonism are defined by a CI<1, CI=1 or CI>1, respectively. Of note, experiments with dexamethasone (dex) in REH cells were not performed since these cells are resistant due to a lack of functional Glucocorticoid Receptor<sup>14</sup> and with vincristine (VCR) since they showed to be highly sensitive. Cells were treated at the molar ratio (Chemio: SYK inhibitor) of 1:100 for cytarabine (AraC) or 1:10 for Dex and VCR.

| Combination Index (CI) GI <sub>50</sub> | AT-1         | AT-2         | REH          |
|-----------------------------------------|--------------|--------------|--------------|
|                                         |              |              |              |
| <b>AraC+ entospletinib</b>              | <b>0.162</b> | <b>0.320</b> | <b>0.956</b> |
| <b>AraC+ fostamatinib</b>               | 0.329        | 2.255        | 3.077        |
| <b>AraC+ PRT-060318</b>                 | 0.630        | 0.999        | 0.868        |
|                                         |              |              |              |
| <b>Dex+ entospletinib</b>               | <b>0.082</b> | <b>0.165</b> | ND           |
| <b>Dex+ fostamatinib</b>                | 0.290        | 0.006        | ND           |
| <b>Dex+ PRT-060318</b>                  | 0.639        | 0.817        | ND           |
|                                         |              |              |              |
| <b>VCR+ entospletinib</b>               | <b>0.073</b> | <b>0.321</b> | ND           |
| <b>VCR+ fostamatinib</b>                | 0.097        | 0.338        | ND           |
| <b>VCR+ PRT-060318</b>                  | 0.755        | 1.089        | ND           |
|                                         |              |              |              |

**Supplementary Table 2**

**CI values in AT-1, AT-2 and REH cell lines.** CI values at the indicated concentrations of entospletinib with fixed VDA at 1 unit. Ento: entospletinib, VDA (VCR+Dex+AraC).

|               | Combination Index (CI) |            |            |
|---------------|------------------------|------------|------------|
|               | VDA + ento             | VDA + ento | VDA + ento |
|               | AT-1                   | AT-2       | REH        |
| entospletinib |                        |            |            |
| 100 µM        | 0.188                  | 0.220      | 0.643      |
| 50 µM         | 0.413                  | 0.375      | 0.718      |
| 25 µM         | 0.385                  | 0.357      | 0.403      |
| 12,5 µM       | 0.204                  | 0.262      | 0.224      |
|               |                        |            |            |

## Supplementary figures:

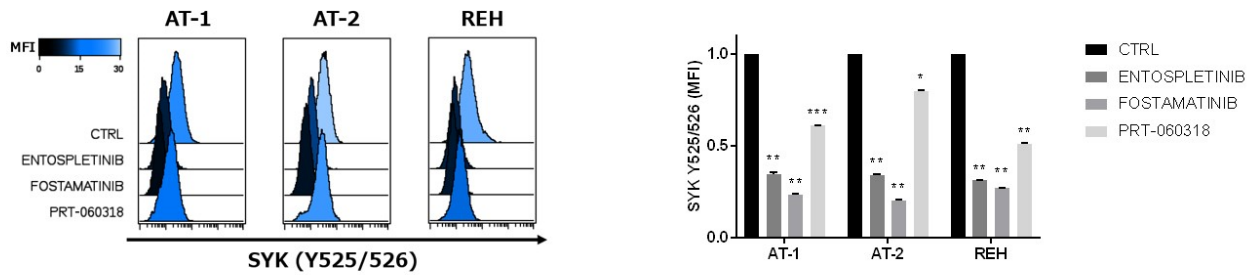

**Figure S1: SYK Y525/Y526 phosphorylation measured by phosphoflow.** Right panel. Reduction of SYK Y525/Y526 phosphorylation measured by phosphoflow in AT-1, AT-2 and REH cell lines after 1 hour of treatment with DMSO (CTRL) or with 5  $\mu$ M SYK inhibitors. MFI= Median Fluorescence Intensity. Left panel. Fold change reduction of SYK Y525/Y526 phosphorylation measured by phosphoflow in AT-1, AT-2 and REH cell lines after 1 hour of treatment with DMSO (CTRL) or with 5  $\mu$ M SYK inhibitors. Paired t test; \*  $p \leq 0.05$ , \*\*  $p \leq 0.01$ ; \*\*\*  $p \leq 0.001$ ; n=3 for all experiments. Results are presented as means  $\pm$  SEM. CTRL was set to 1.0.

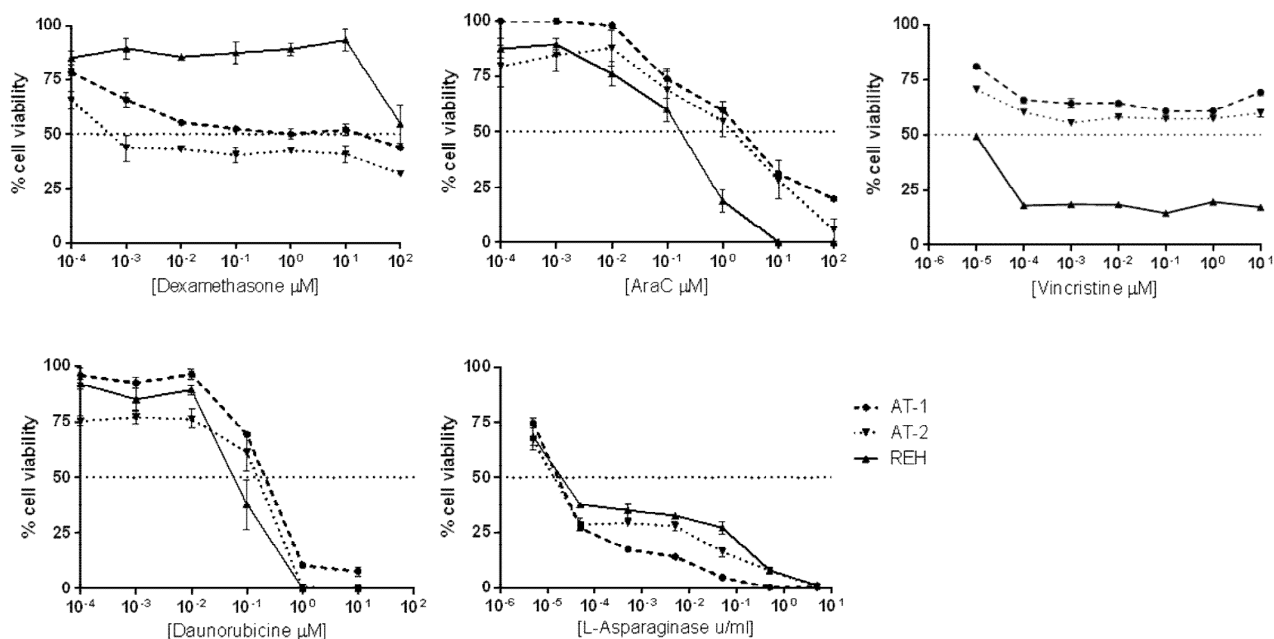

**Figure S2: Sensitivity of AT-1, AT-2 and REH cells to the conventional chemotherapeutic compounds.** Cell viability of AT-1, AT-2 and REH cells after treatment for 48 hours with dexamethasone, AraC, vincristine, daunorubicine and L-Asparaginase. All experiments were performed at least 3 times, and data are represented as mean  $\pm$  SEM.

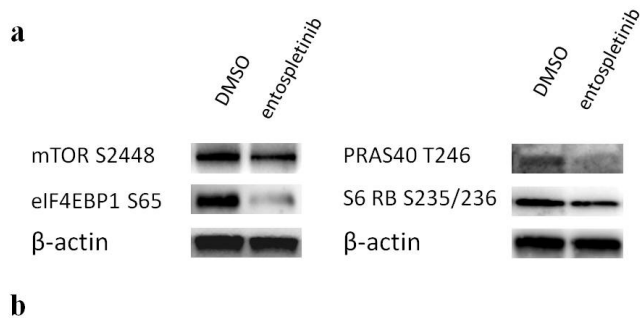

**b**

| Antibody       | DMSO     | entospletinib |
|----------------|----------|---------------|
| mTOR S2448     | 1,294377 | 0,910453      |
| eIF4EBP1 S65   | 0,861115 | 0,276838      |
| PRAS40 T246    | 0,682033 | 0,286682      |
| S6 RB S235/236 | 0,850192 | 0,459063      |

**Figure S3: Western blot for mTOR pathway in AT-1 cell line treated with entospletinib. a)** Western Blot analysis for mTOR S2448, eIF4EBP1 S65, PRAS40 T246, S6 Ribosomal Protein S235/236 and  $\beta$ -actin in AT-1 cell line after 1 hour treatment with DMSO or with 10  $\mu$ M of entospletinib. **b)** Densitometric values after normalization of antibodies signal intensity to  $\beta$ -actin with ImageJ software.

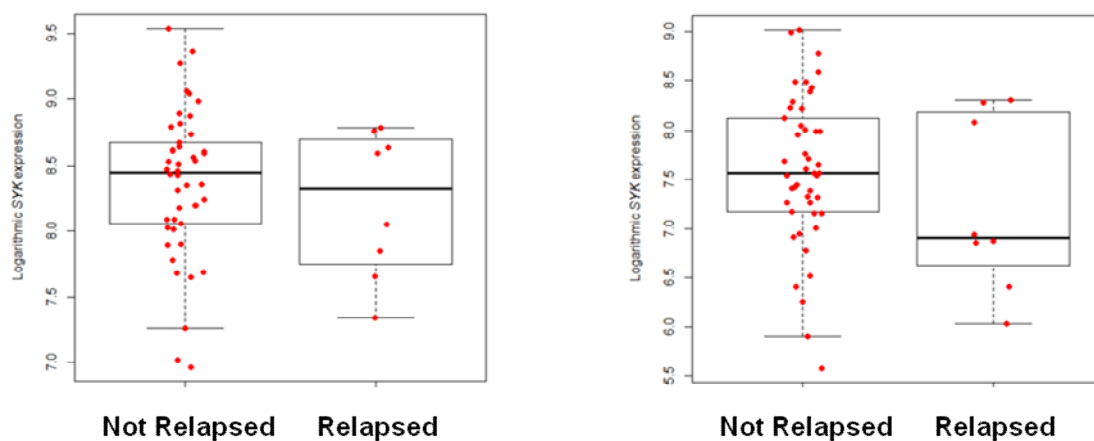

**Figure S4: *SYK* mRNA expression in ETV6-RUNX1 patients.** *SYK* mRNA in log2 expression measured by gene expression analysis in an independent cohort of 54 ETV6-RUNX1 B-ALL patients (n= 46 not relapsed, n= 8 relapsed) by Affymetrix HG-U133Plus 2.0 arrays. The two panels show the two different probe sets (226068\_s\_at and 207540\_s\_at) for *SYK*. The average expression of *SYK* between ETV6-RUNX1 patients who did not relapse and the ones who relapsed is not significantly different. Results are presented as mean  $\pm$  SD.

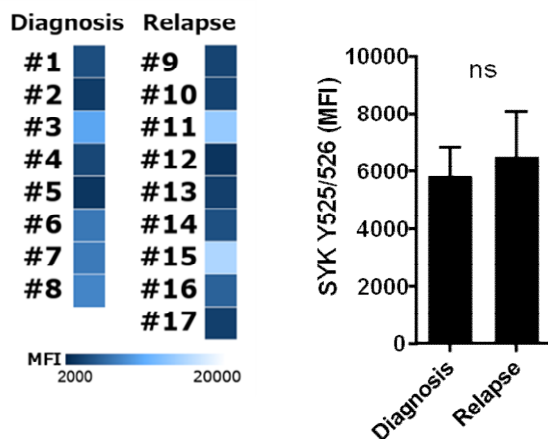

**Figure S5: Phosphorylation of SYK Y525/526 in primary cells.** Phosphorylation was measured by phosphoflow in primary cells from 8 diagnosis and 9 unmatched relapses of ETV6-RUNX1 patients. Data are presented as a heatmap of Median Fluorescence Intensity (MFI) of positive-cells in the live-gated cell subpopulation (left panel) or as MFI mean  $\pm$  DS (right panel).

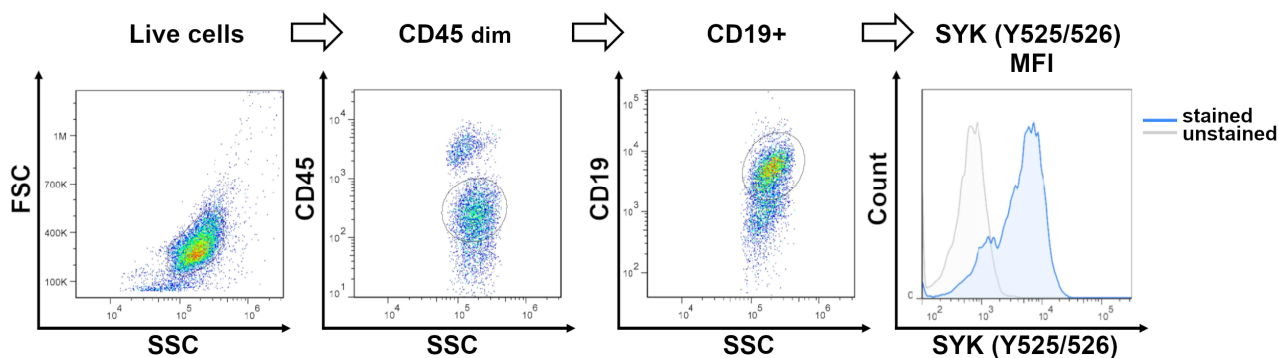

**Figure S6: Gating strategy used in phospho-flow cytometry analysis.** Representative image on patient #6, showing the gating strategy used for SYK (Y525/526) Median Fluorescent Intensity (MFI) detection, evaluated on live-gated CD45<sup>dim</sup>/CD19<sup>+</sup> cell population.
